# 1 When do longer reads matter? A 2 benchmark of long read de novo 3 assembly tools for eukaryotic genomes

4 Bianca-Maria Cosma<sup>1</sup>, Ramin Shirali Hossein Zade<sup>1</sup>, Erin Noel Jordan<sup>1,2</sup>, Paul van  
5 Lent<sup>1</sup>, Chengyao Peng<sup>1</sup>, Stephanie Pillay<sup>1</sup>, and Thomas Abeel<sup>1,3,\*</sup>

6 <sup>1</sup>Delft Bioinformatics Lab, Delft University of Technology Van Mourik, Broekmanweg 6, 2628 XE, Delft, The  
7 Netherlands; <sup>23</sup>Technical Biochemistry, TU Dortmund University, Emil-Figge-Straße 66, 44227, Dortmund,  
8 Germany; and <sup>4</sup>Infectious Disease and Microbiome Program, Broad Institute of MIT and Harvard, 415 Main Street,  
9 Cambridge, MA, 02142, USA

10 \*t.abeel@tudelft.nl

## 11 Abstract

12 **Background:** Assembly algorithm choice should be a deliberate, well-justified decision when  
13 researchers create genome assemblies for eukaryotic organisms from third-generation sequencing  
14 technologies. While third-generation sequencing by Oxford Nanopore Technologies (ONT) and  
15 Pacific Biosciences (PacBio) have overcome the disadvantages of short read lengths specific to next-  
16 generation sequencing (NGS), third-generation sequencers are known to produce more error-prone  
17 reads, thereby generating a new set of challenges for assembly algorithms and pipelines. Since the  
18 introduction of third-generation sequencing technologies, many tools have been developed that aim  
19 to take advantage of the longer reads, and researchers need to choose the correct assembler for  
20 their projects.

21 **Results:** We benchmarked state-of-the-art long-read *de novo* assemblers, to help readers make a  
22 balanced choice for the assembly of eukaryotes. To this end, we used 13 real and 72 simulated  
23 datasets from different eukaryotic genomes, with different read length distributions, imitating  
24 PacBio CLR, PacBio HiFi, and ONT sequencing to evaluate the assemblers. We include five commonly  
25 used long read assemblers in our benchmark: Canu, Flye, Miniasm, Raven and Redbean. Evaluation

26 categories address the following metrics: reference-based metrics, assembly statistics, misassembly  
27 count, BUSCO completeness, runtime, and RAM usage. Additionally, we investigated the effect of  
28 increased read length on the quality of the assemblies, and report that read length can, but does not  
29 always, positively impact assembly quality.

30 **Conclusions:** Our benchmark concludes that there is no assembler that performs the best in all the  
31 evaluation categories. However, our results shows that overall Flye is the best-performing  
32 assembler, both on real and simulated data. Next, the benchmarking using longer reads shows that  
33 the increased read length improves assembly quality, but the extent to which that can be achieved  
34 depends on the size and complexity of the reference genome.

35 Key words: *De novo* assembly, Third-generation sequencing, Benchmarking, Eukaryote genomes.

## 36 Introduction

37 *De novo* genome assembly is essential in several leading fields of research, including disease  
38 identification, gene identification, and evolutionary biology [1–4]. Unlike reference-based assembly,  
39 which relies on the use of a reference genome, *de novo* assembly only uses the genomic information  
40 contained within the sequenced reads. Since it is not constrained to the use of a reference, high quality  
41 *de novo* assembly is essential for studying novel organisms, as well as for the discovery of overlooked  
42 genomic features, such as gene duplication [5], in previously assembled genomes.

43 The introduction of Third Generation Sequencing (TGS) led to massive improvements in *de novo*  
44 assembly. The advent of TGS has addressed the main drawback of Next Generation Sequencing (NGS)  
45 platforms, namely the short read length, but has introduced new challenges in genome assembly,  
46 because of the higher error rates of long reads. The leading platforms in long-read sequencing are  
47 Pacific Biosciences Single Molecule, Real-Time sequencing (often abbreviated as "PacBio") and Oxford  
48 Nanopore (ONT) sequencing [6].

49 Since the introduction of TGS platforms, many methods have been developed that aim to take the  
50 most benefits from the longer read length and overcome the new challenges due to sequencing error.  
51 Recent studies have been conducted to compare long-read de novo assemblers. One such study was  
52 conducted by Wick and Holt [7], who focused on long-read de novo assembly of prokaryotic genomes.  
53 Eight assemblers were tested on real and simulated reads from PacBio and ONT sequencing, and  
54 evaluation metrics included sequence identities, circularisation of contigs, computational resources,  
55 as well as accuracy. Murigneux et al. [8] performed similar experiments on the genome of *M. janssenii*,  
56 although in this case, the focus was on comparatively benchmarking Illumina sequencing and three  
57 long-read sequencing technologies, in addition to the comparison of long-read assembly tools. Studies  
58 narrowed down to just one type of sequencing technology include those of Jung et al. [9], who  
59 evaluated assemblers on real PacBio reads from five plant genomes, and Chen et al. [10], who used  
60 Oxford Nanopore real and simulated reads from bacterial pathogens in their comparison. Except for  
61 the Wick and Holt study, which provides a compressive comparison on de novo assembly of  
62 prokaryotic genomes, other studies are either comparing the assemblers on single genome or using  
63 data from a single sequencing platform. Here, we provide a comprehensive comparison on de novo  
64 assembly tools on all TGS technologies and 7 different eukaryotic genomes, to complement the study  
65 of Wick and Holt.

66 In this study, we are benchmarking these methods using 13 real and 72 simulated datasets (see Figure  
67 1) from both PacBio and ONT platforms to guide researchers to choose the proper assembler for their  
68 studies. Benchmarking using simulated reads allows us to accurately compare the final assembly with  
69 the ground truth, and benchmarking using the real reads can validate the results based on simulated  
70 reads. The assembler comparison presented in this manuscript complements the literature that has  
71 already been published, by introducing an analysis of not just assembler performance, but also of the  
72 effect of read length on assembly quality. Although increased read length is considered an advantage,  
73 we investigate if it is always a necessary advantage to have for assembly performance. To that end,  
74 the scope of the study extends to six model eukaryotes that provide a performance indication for

75 genomes of variable complexity, covering a wide range of taxa on the eukaryotic branch of the Tree  
 76 of Life [11]. Complexity in genome assembly is determined by multiple variables, the most notable of  
 77 which is the proportion of repetitive sequences within the genome of a particular organism.  
 78 Complexity in eukaryotic genomes is further exacerbated by size and organization of chromosomal  
 79 architecture, including telomeres and centromeres, and the presence of circular elements such as  
 80 mitochondrial and chloroplast DNA.

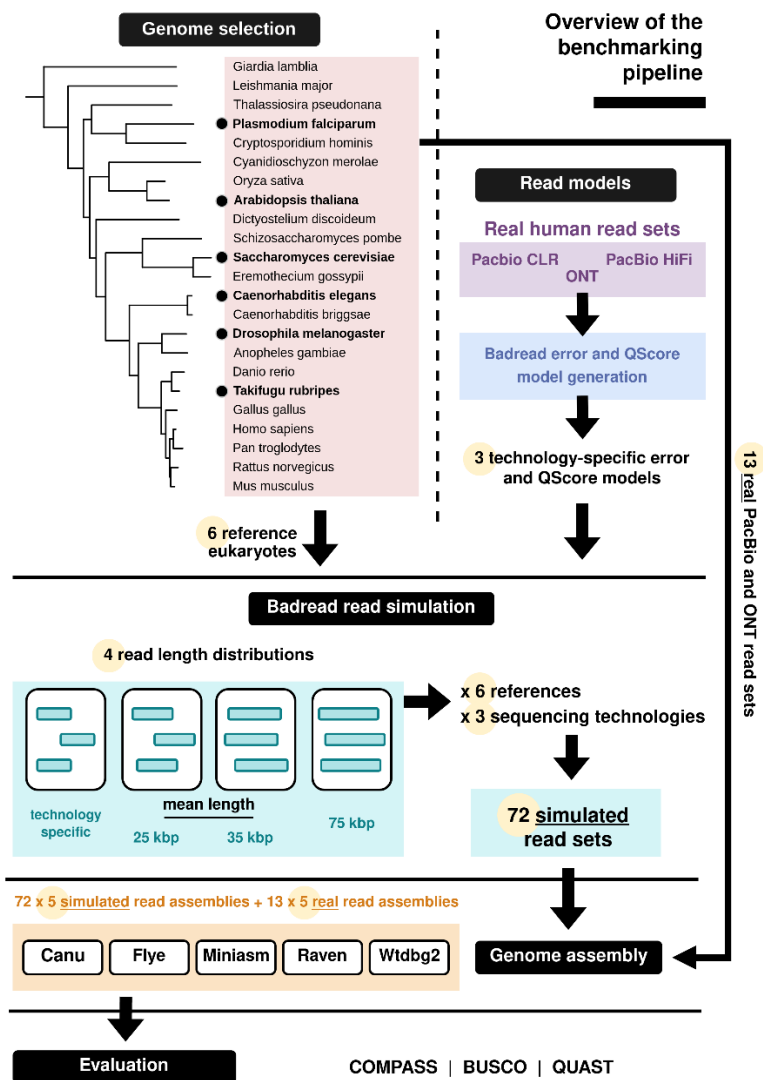

81

82 **Figure 1:** The benchmarking pipeline. We first select 6 representative eukaryotes from the Tree of Life (Letunic and Bork,  
 83 2021) and use Badread's error and QScore model generation feature (Wick, 2019) to create 3 models of state-of-the-art long  
 84 sequencing technologies. This is input to the read simulation stage, where we simulate reads from all genomes, with four

85 different read length distributions. We then perform assembly of simulated and real reads, using five long-read assemblers.  
86 Lastly, we evaluate all assemblies based on several criteria.

87 De novo genome assembly evaluation remains challenging, as it represents a process that must  
88 account for variables such as the goal of an assembly and the existence of a ground-truth reference.  
89 A standard evaluation procedure was introduced in the literature by the two Assemblathon  
90 competitions [12,13], which outlined a selection of metrics that encompasses the most relevant  
91 aspects of genome assembly, however, these metrics require a reference sequence. Most of these  
92 metrics are adopted in our benchmark.

93 Consequently, this study addresses two main objectives. First, we provide a systematic comparison of  
94 five state-of-the-art long-read assembly tools, documenting their performance in assembling real and  
95 simulated PacBio Continuous Long Reads (CLRs), PacBio Circular Consensus Sequencing (CCS) HiFi  
96 reads, and Oxford Nanopore reads, generated from the genomes of *S. cerevisiae*, *P. falciparum*, *C.*  
97 *elegans*, *A. thaliana*, *D. melanogaster*, and *T. rubripes*. Our second objective is to investigate whether  
98 increased read length has a positive effect on overall assembly quality, given that increasing the length  
99 of reads is an on-going effort in the development of Third Generation Sequencing platforms [14].

## 100 Materials and methods

### 101 Data

102 In this study, we are using real and simulated data from various organisms to benchmark long read  
103 *de novo* assembly tools.

### 104 Reference genomes

105 We selected six reference genomes from eukaryotic organisms represented in the Interactive Tree Of  
106 Life (iTOL) v6 [11]: *S. cerevisiae* (strain S288C), *P. falciparum* (isolate 3D7), *C. elegans* (strain VC2010),  
107 *A. thaliana* (ecotype Col-0), *D. melanogaster* (strain ISO-1), and *T. rubripes*. Assembly accessions are  
108 included in Supplementary Table S1.

109 The reference assemblies for *C. elegans*, *D. melanogaster*, and *T. rubripes* included uncalled bases. In  
110 these cases, before read simulation, each base N was replaced with base A, as done by Wick and Holt  
111 [7]. This avoids ambiguity in the read simulation process and consequently simplifies the evaluation  
112 of the simulated-read assemblies. As such, we used this modified version as a reference when  
113 evaluating all assemblies of simulated reads from these four genomes. In the evaluation of real-read  
114 assemblies, the original assemblies were used as references.

### 115 Simulated reads

116 All simulated read sets were generated using Badread v0.2.0 [15]. To create read error and QScore  
117 (quality score) models in addition to the simulator's own default models, Badread requires the  
118 following three parameters: a set of real reads, a high-quality reference genome, and an alignment  
119 file, obtained by aligning the reads to the reference genome. We used real read sets from the human  
120 genome to create error and QScore models that reflect the state-of-the-art for three sequencing  
121 technologies: PacBio Continuous Long Reads (CLRs), PacBio Circular Consensus Sequencing (CCS) HiFi  
122 reads, and Oxford Nanopore reads.

123 To create the models, we used the real read sets sequenced from the human genome and aligned to  
124 the latest high-quality human genome reference assembled by [16]: assembly T2T-CHM13v2.0, with  
125 RefSeq accession GCF\_009914755.1. The alignment was performed using Minimap2 v2.24 [17] with  
126 default parameters. The sources for these sequencing data are outlined in Supplementary Table S2,  
127 as well as the read identities for each technology, which are later passed as parameters for the  
128 simulation stage.

129 For each of the six reference genomes, we simulated reads that imitate PacBio CLR, PacBio HiFi, and  
130 Oxford Nanopore sequencing, with four different read length distributions, using Badread. The first  
131 read simulation represents the current state of the three long-read technologies. The other three  
132 simulations reflect data points in-between technology-specific values and ultra-long reads, data points  
133 of a similar length as ultra-long-reads, and longer than ultra-long reads. Since Badread's read length

134 models are parameterized by gamma distributions, we need to define the mean and standard  
135 deviation of the gamma distributions for these simulations. The values for the mean and standard  
136 deviation of these distributions were selected as follows. First, we calculated the read length  
137 distributions of the real read sets in Supplementary Table S2 and simulated an initial iteration of reads  
138 using these technology-specific values. For choosing these values for the other three iterations, we  
139 analysed a set of Oxford Nanopore Ultra-Long reads used in the latest assembly of the human genome  
140 (Nurk *et al.*, 2022). We selected GridION run SRR12564452, available as sequence data in BioProject  
141 PRJNA559484, with a mean read length of approximately 35.7 kbp, and a standard deviation of 42.5  
142 kbp.

143 A full overview of the mean and standard deviation of all four read length distributions is given in  
144 Table 1. Note that, for each of the technologies, the standard deviation for the last three distributions  
145 was derived from the mean, using the ratio between the mean and standard deviation reflected by  
146 the technology-specific values. Hence, for the last three iterations, the mean read length is consistent  
147 across sequencing technologies, but the standard deviation varies.

148 **Table 1:** The mean and standard deviation describing the read length distributions used in our simulations. Note that read  
149 length increases with each iteration, and the distribution parameters are different for each technology.

|                                                    | Read length distribution parameters (kbp), per technology |       |             |       |                 |       |
|----------------------------------------------------|-----------------------------------------------------------|-------|-------------|-------|-----------------|-------|
|                                                    | PacBio CLR                                                |       | PacBio HiFi |       | Oxford Nanopore |       |
|                                                    | Mean                                                      | Stdev | Mean        | Stdev | Mean            | Stdev |
| <b>Iteration 1</b><br>(technology-specific values) | 15.7                                                      | 14.4  | 20.7        | 2.5   | 12.1            | 17.1  |
| <b>Iteration 2</b>                                 | 25                                                        | 22.5  | 25          | 3     | 25              | 35    |
| <b>Iteration 3</b><br>(imitate ultra-long reads)   | 35                                                        | 31.5  | 35          | 4.2   | 35              | 49    |
| <b>Iteration 4</b>                                 | 75                                                        | 67.5  | 75          | 9     | 75              | 105   |

150

151 Consequently, we ran twelve simulations for each reference genome. As described above, we used  
152 our own models for each technology, and passed them to the simulator as the `--error_model` and  
153 `--qscore_model`. The read identities per technology were set to the values included in

154 Supplementary table S2. Across all simulations, we chose a coverage depth of 30x. Canu's  
155 documentation [18] specifies a minimum coverage of 20 - 25x for HiFi data, and 20x for other types of  
156 data, while Flye's guidelines [19] indicate a minimum coverage of 30x. As there is no minimum  
157 recommended coverage indicated for the other assemblers we used in our benchmark, we simulated  
158 reads following the stricter guideline among these two, that is, 30x coverage.

159 A summary of the Badread commands used in our simulation can be found in Supplementary Table  
160 S3. Note that, in the case of simulated HiFi reads, we additionally lowered the rates of glitches,  
161 random, junk, and chimeric reads to reflect the higher accuracy of this technology. We set the  
162 percentage of chimeras to 0.04, as estimated by [20].

### 163 Real reads

164 In support of our evaluation on simulated reads, we also performed a benchmark on real-read  
165 assemblies from Oxford Nanopore and PacBio reads sequenced from the reference genomes. These  
166 reads were sampled to approximately 30x coverage, to ensure a fair comparison with our simulated-  
167 read assemblies. The data sources for all real sets are included in Supplementary Table S4.

### 168 Assemblies

169 Five long-read de novo assemblers are included in this benchmark: Canu v2.2 [18], Flye v2.9 [19],  
170 Redbean (also known as Wtdbg2) v2.5 [21], Raven v1.7.0 [22], and Miniasm v0.3\_r179 [23].

171 The assemblies were performed with default values for most parameters. Canu and Wtdbg2 require  
172 the estimated genome size as a parameter, and we set the following values: *S. cerevisiae* = 12 Mbp, *P.*  
173 *falciparum* = 23 Mbp, *A. thaliana* = 135 Mbp, *D. melanogaster* = 139 Mbp, *C. elegans* = 103 Mbp, and  
174 *T. rubripes* = 384 Mbp. All commands used in the assembly pipelines are available in Supplementary  
175 Table S6. We note that further polishing of assemblies using high-fidelity short reads, although  
176 common in practice [24–26], is omitted in this study, as the focus is exclusively on assembler  
177 performance on long-read data and not polishing tools.



178 We added a long-read polishing step for Miniasm and Wtdbg2, as their assembly pipelines do not  
179 include long-read based polishing. Following Raven's default pipeline, which performs two rounds of  
180 Racon polishing [27], we used two rounds of Racon polishing on Wtdbg2 and Miniasm. We note that  
181 for Miniasm, we used Minipolish [7], which simplifies Racon polishing by applying it in two iterations  
182 on the GFA (Graphical Fragment Assembly) files produced by the assembler. For both Miniasm and  
183 Wtdbg2, the alignments required for polishing were generated with Minimap v2.24.

## 184 Evaluation

185 We evaluated the assemblies in three different categories of metrics. The COMPASS analysis compares  
186 the assemblies with their corresponding reference genome and provides insight into their similarities.  
187 The assembly statistics provide some basic knowledge about the contiguity and misassemblies. Finally,  
188 the BUSCO assessment investigates the presence of essential genes in the assemblies. These three  
189 categories of metrics, next to each other, can provide a complete overview of the assembly's quality.

### 190 COMPASS analysis

191 For each assembly, we ran the COMPASS script to measure the coverage, validity, multiplicity and  
192 parsimony, to assess the quality of the assemblies, as defined in Assemblathon 2 [13]. These metrics  
193 describe several characteristics that were deemed important for comparing *de novo* assembly tools,  
194 and were computed using three types of data: (1) the reference sequence, (2) the assembled scaffolds,  
195 and (3) the alignments (sequences from the assembled scaffolds that were aligned to the reference  
196 sequences). Definitions and formulas for the metrics are reported in Supplementary Table S5.

### 197 Assembly statistics and misassembly events

198 We use QUILT v5.0.2 [28] is used to measure the NG50 [12] (Earl *et al.*, 2011) of an assembly and the  
199 number of misassemblies. QUILT identifies misassemblies based on the definition outlined by [29].  
200 The total number of misassemblies is the sum of all relocations, inversions, and translocations.  
201 Considering two adjacent flanking sequences, if they both align to the same chromosome, but 1 kbp  
202 away from each other, or overlapping for more than 1 kbp, this is counted as a relocation. If these

203 flanking sequences, aligned to the same chromosome, are on opposite strands, the misassembly is  
204 considered an inversion. Lastly, translocations describe events in which two flanking sequences align  
205 to different chromosomes.

## 206 BUSCO assessment

207 BUSCO v5.4.2 assessment [30,31] is performed to evaluate the completeness of the essential genes in  
208 the assemblies. This quantifies the number of single-copy, duplicated, fragmented and missing  
209 orthologs in an assembled genome. From the number of orthologs specific to each dataset, BUSCO  
210 identifies how many orthologs are present in the assembly (either as single-copy or duplicated), how  
211 many are fragmented, and how many are missing. We ran these evaluations with a different OrthoDB  
212 lineage dataset for each genome: *S. cerevisiae* - saccharomycetes, *P. falciparum* - plasmodium, *A.*  
213 *thaliana* - brassicales, *D. melanogaster* - diptera, *C. elegans* - nematoda, and *T. rubripes* -  
214 actinopterygii.

## 215 Results and discussion

### 216 Overview of the benchmarking pipeline

217 Figure 1 shows an overview of the benchmarking pipeline. We begin with the selection of six  
218 representative eukaryotes from the interactive Tree of Life [11]: *S. cerevisiae*, *P. falciparum*, *A.*  
219 *thaliana*, *D. melanogaster*, *C. elegans*, and *T. rubripes*. We also use three read sets from the latest  
220 human assembly project [16] to generate Badread error and Qscore models [15] for PacBio  
221 Continuous Long Reads (CLRs), PacBio High Fidelity reads, and Oxford Nanopore reads (see  
222 Supplementary Table S2). The reference sequences and models become input to the Badread  
223 simulation stage. For each genome, we simulate reads with four different read length distributions  
224 and three sequencing technologies (see Table 1), amounting to a total of 12 simulated read sets per  
225 reference genome. These reads, as well as 13 real read sets, are assembled with five assembly tools:  
226 Canu, Flye, Miniasm, Raven, and Wtdbg2.

227 Next, the resulting assemblies are evaluated using COMPASS, QUAST, and BUSCO, and based on the  
228 reported metrics we distinguish six main evaluation categories: sequence identity, repeat collapse,  
229 rate of valid sequences, contiguity, misassembly count, and gene identification. The selected  
230 COMPASS metrics are the coverage, multiplicity, and validity of an assembly, which provide insight on  
231 sequence identity, repeat collapse, and the rate of valid sequences, respectively. In this regard, an  
232 ideal assembly has coverage, multiplicity and validity close to 1. This suggests that a large fraction of  
233 the reference genome is assembled, repeats are generally collapsed instead of replicated, and most  
234 sequences in the assembly are validated by the reference. Among others, QUAST reports the number  
235 of misassemblies and the NG50 of an assembly. A high NG50 value is associated with high contiguity.  
236 In order to assess contiguity across genomes of different sizes, we report the ratio between the  
237 assembly's NG50 and the N50 of the references. Lastly, gene identification is quantified in terms of  
238 the percentage of complete BUSCOs in an assembly.

239 [The search for an optimal assembler is influenced by read sequencing technology,](#)  
240 [genome complexity, and research goal](#)

241 To select an assembler that is most versatile across eukaryotic taxa, we simulate PacBio Continuous  
242 Long Reads (CLRs), PacBio High Fidelity (HiFi) reads, and Oxford Nanopore reads from the genomes of  
243 six model eukaryotes, assemble these reads, and evaluate the assemblers in the six main categories  
244 mentioned in the previous section. The results for each evaluation category are normalized in the  
245 range given by the worst and best values encountered in the evaluation of all assemblies of reads with  
246 default length. This highlights differences between assemblers, as well as between genomes and  
247 sequencing technologies.

248 The results of the benchmark on the read sets with default lengths, namely those belonging to the  
249 first iteration (see Table 1), are illustrated in Figure 2. A full report of the evaluation metrics in this  
250 figure is included in the Supplementary Tables S7 – S24, under “Iteration 1”. We note that no  
251 assembler unanimously ranks first in all categories, across different sequencing technologies and

252 eukaryotic genomes, although our findings highlight some of their strengths and thus their potential  
253 for various research aims. The runtime and memory usage of the assembly tools on all of the simulated  
254 datasets are reported in Supplementary Tables S25 – S30, since this can also be a deciding factor next  
255 to the quality of the assembly for the researchers to choose the suitable assembler for their purpose.  
256 We note that all assemblies were run on our local High Performance Computing Cluster, and the  
257 runtime and RAM usage may have been affected by the heterogeneity of the shared computing  
258 environment in which the assembly jobs executed.

259 Miniasm, Raven and Wtdbg2 are all well-rounded choices for the simpler *S. cerevisiae*, *P. falciparum*  
260 and *C. elegans* genomes, with a balanced trade-off between assembly quality and computational  
261 resources. For PacBio HiFi reads, Raven is generally qualitatively outperformed by other assemblers  
262 like Canu, Flye, and Miniasm, likely as a consequence of the fact that its pipeline is not customized for  
263 all long-read sequencing technology. Nonetheless, if computational resources are a concern, Raven is  
264 a more suitable choice, since Miniasm and Wtdbg2 do not scale well for larger genomes.

265 We can single out Flye as the most robust assembler across all six organisms, although for larger  
266 genomes such as *T. rubripes*, Canu is a better tool. Both produce assemblies with high sequence  
267 identity and validity, as well as good gene prediction, but Flye assemblies generally rank first when we  
268 compute the average score across all six metrics. For Canu, we notice more variation in assembly  
269 quality across different genomes, particularly for *P. falciparum* and *A. thaliana*, while Flye maintains  
270 more consistent results. Nonetheless, on the *T. rubripes* genome, Canu assemblies have higher  
271 sequence identity and contiguity, as well as more accurate gene identification.

272

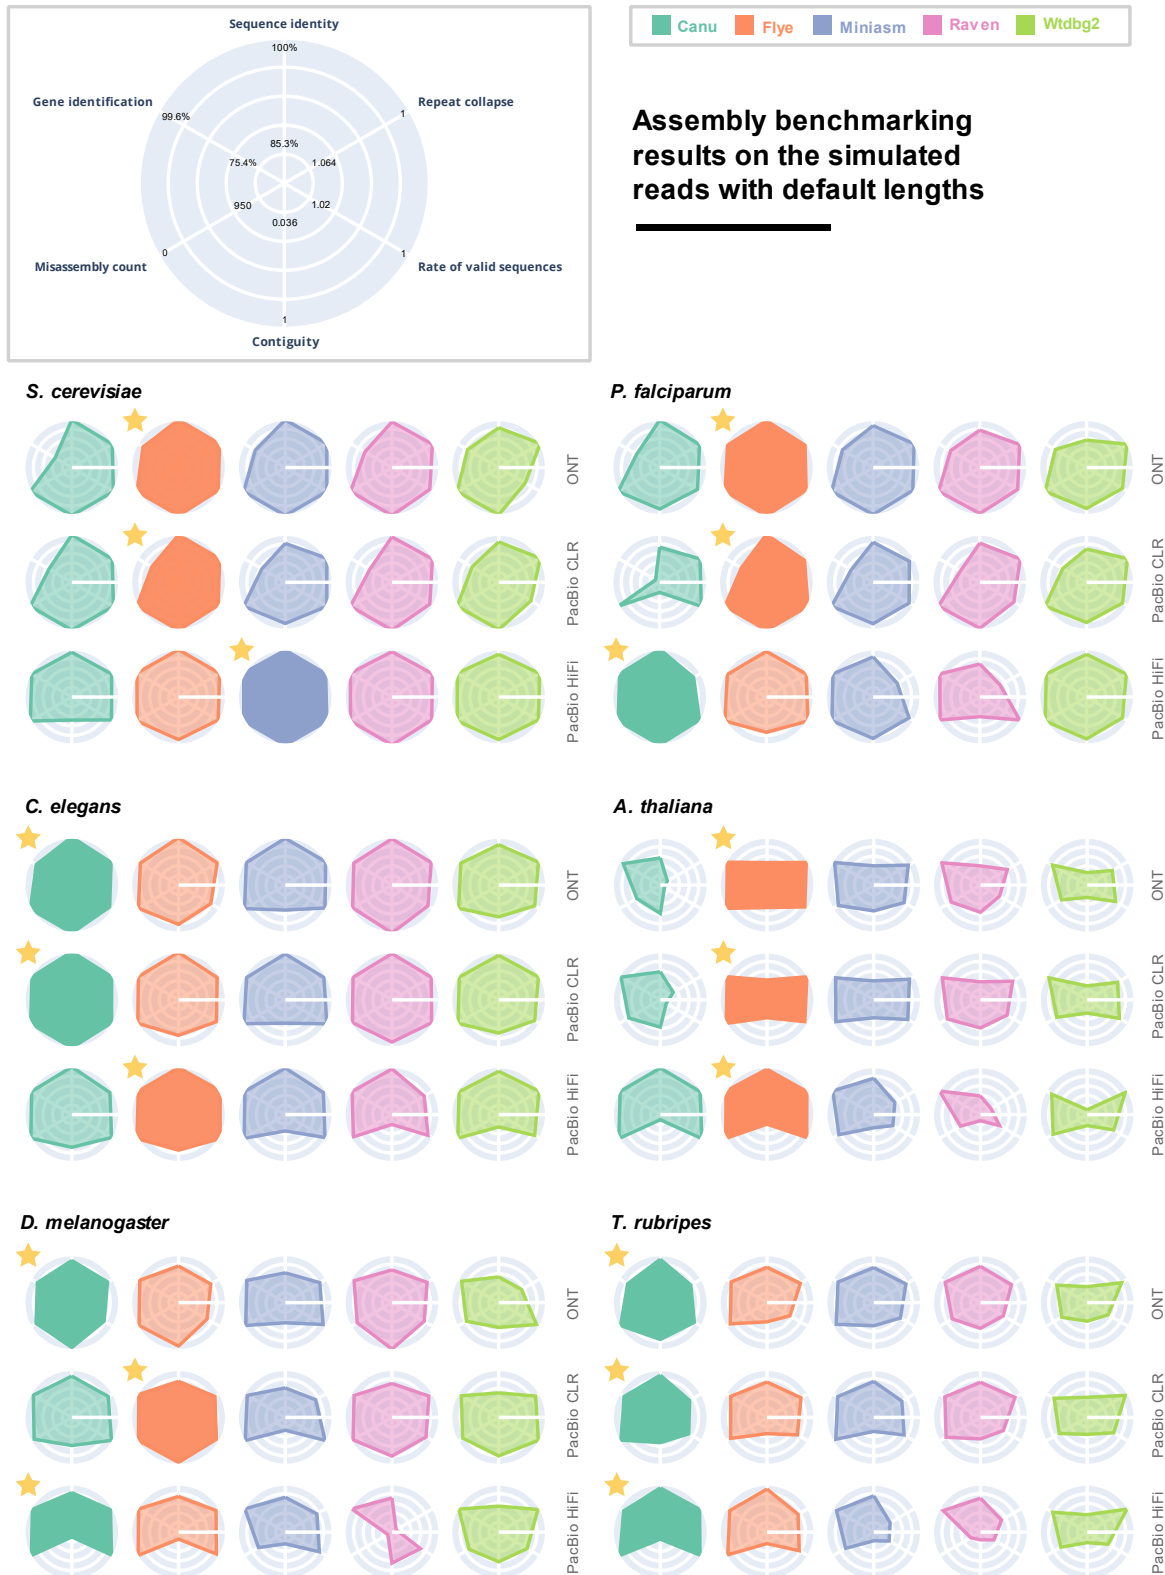

273

274 **Figure 2:** The performance of the five assemblers on the read sets with default read lengths, from iteration 1 (see Table 1),

275 generated from six eukaryotic genomes. Six evaluation categories are reported for each assembler, and the results are

276 normalized among all assemblies included in the figure. Ranges for each metric are reported as the best and worst values  
277 computed for these assemblies. The best performing assembler is highlighted for each read set, and marked with a star.

## 278 Evaluation of real-read assemblies supports our rankings on simulated-read 279 assemblies

280 To determine assembler performance on real reads and validate the rankings of the simulated-read  
281 assemblies, we assemble several real read sets from the six reference eukaryotes (Supplementary  
282 Table S4). The evaluation results on the real-read assemblies, summarized in Figure 3, indicate that  
283 assemblers which perform well on simulated reads perform similarly well in assembling the sets of  
284 real reads. The full report of metrics on the real read assemblies is included in Supplementary Table  
285 S31. We conclude that, overall, the assembler rankings remain consistent. This illustrates that  
286 benchmarking using simulated data is similar to real read sets. For reference-based metrics, we used  
287 the reference genomes given in Supplementary Table S1.

288 Notably, reference-based metrics in the evaluation of real-read assemblies rely on comparisons with  
289 an assembly, and not the genome from which the reads were initially sequenced. In contrast to the  
290 evaluation of simulated-read assemblies, the existence of a ground truth reference is not available in  
291 this case, but reference-based metrics are included for the sake of consistency with the simulated-  
292 read evaluation.

293 In the evaluation of real-read assemblies, Flye ranks first for nearly all datasets, with the exception of  
294 the *T. rubripes* and *C. elegans* PacBio reads, for which Raven performs better overall. However, even  
295 in *C. elegans*, Flye performance is close to the best values in all metrics other than contiguity. As  
296 expected, overall assembler performance decreases for reference-based metrics like sequence  
297 identity, repeat collapse and validity, but surprisingly the misassembly count is considerably lower.

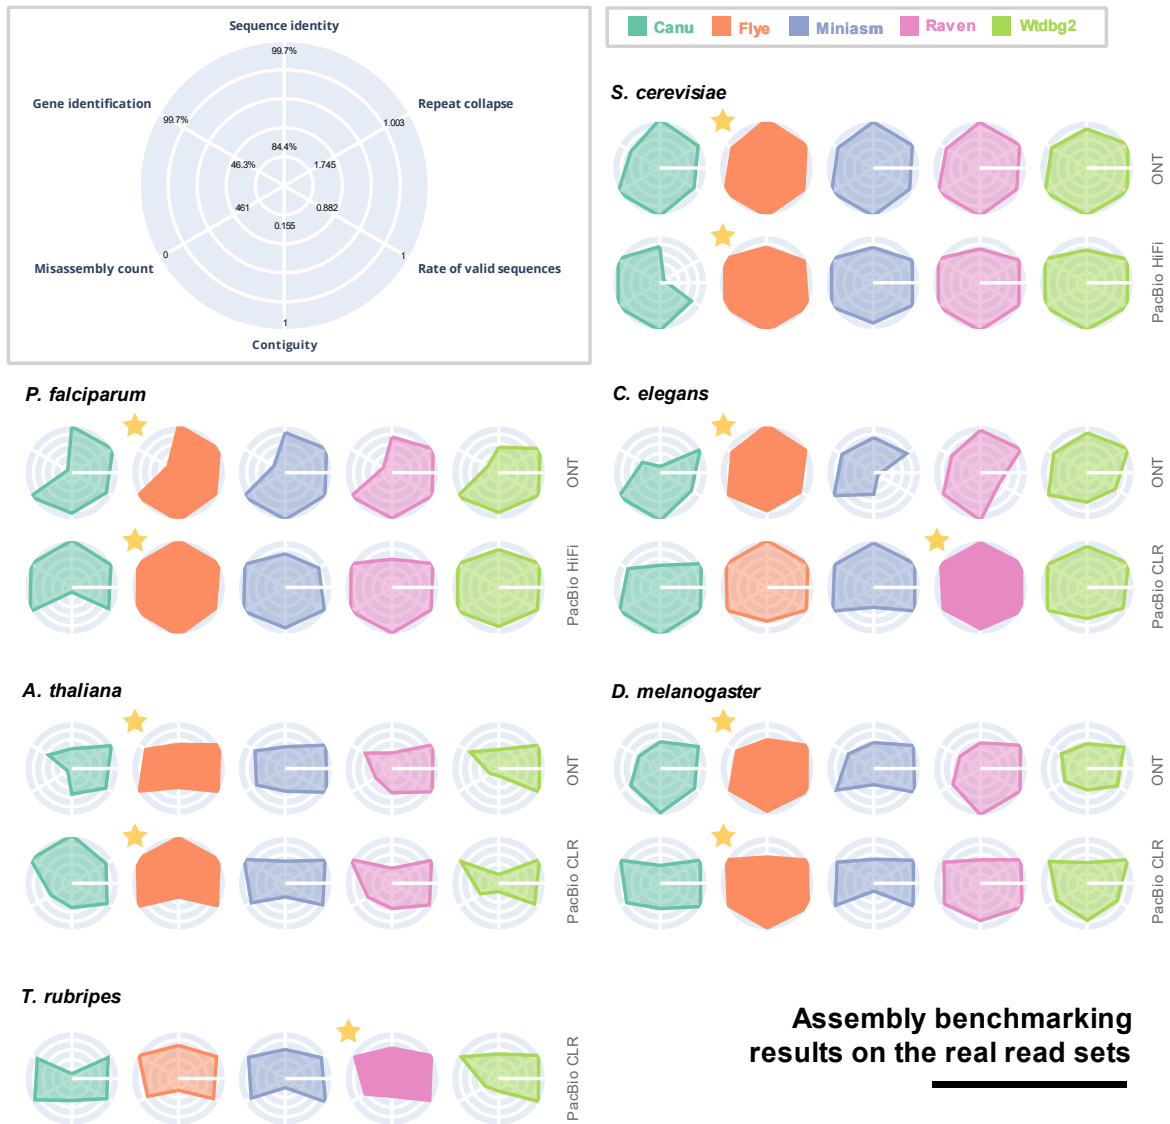

298

299 **Figure 3:** The performance of the five assemblers on the real reads (see Supplementary Table S4), sequenced from six  
 300 eukaryotic genomes. As in Figure 2, six evaluation categories are reported for each assembler, and the results are normalized  
 301 among all assemblies included in the figure. Ranges for each metric are reported as the best and worst values computed for  
 302 these assemblies. The best performing assembler is highlighted for each read set, and marked with a star.

303 Longer reads lead to more contiguous assemblies of large genomes, but do not always  
 304 improve assembly quality

305 To investigate the effect of increased read length on assembly quality, we use Badread to simulate  
 306 Oxford Nanopore, as well as PacBio CLR and HiFi reads with different read length distributions (Table  
 307 1) from the genomes of *S. cerevisiae*, *P. falciparum*, *C. elegans*, *A. thaliana*, *D. melanogaster*, and *T.*

308 *rubripes*. We assemble these reads with five state-of-the-art long-read assemblers, and evaluate  
309 assembly quality based on six evaluation categories (see Overview of the benchmarking pipeline). It is  
310 worth mentioning that Canu iteration 4 assemblies (the longest reads) of *A. thaliana* and *T. rubripes*  
311 did not finish within reasonable time and are excluded from the evaluation.

312 Figure 4 shows a summary of the assemblers' performance on all simulated read sets, highlighting  
313 changes in performance for each read length distribution. All six evaluation metrics are normalized  
314 given the maximum and minimum metric values per genome, per sequencing technology, and  
315 combined to obtain an average score. We then average these three scores again and report a score  
316 between 1 and 10 for each assembler, per read length distribution. The results on all computed  
317 metrics are fully described in Supplementary Tables S7 – S24.

318 The results imply that there is a correlation between the size and complexity of the reference genome  
319 and the extent of the improvement in assembly quality that can be achieved by increasing the length  
320 of the reads. While we observe no trend in assembly quality improvement on the assemblies of smaller  
321 genomes, the results on the *T. rubripes* assemblies are more conclusively in favour of the longer reads.  
322 For instance, on the shorter and simpler *S. cerevisiae* and *P. falciparum* genomes, identification of  
323 repetitive and complex regions is not aided by increased read length, likely as these regions are already  
324 spanned by the reads with default lengths. However, the benchmark results suggest that more  
325 complex and repetitive regions within the *A. thaliana*, *D. melanogaster* and, most notably, *T. rubripes*  
326 genomes are better captured by longer reads.

327 As recorded in Supplementary Table S22 – S24, for larger genomes, longer reads generally lead to  
328 significantly higher assembly contiguity and a lower misassembly count. The latter implies that the  
329 resulting assemblies are more faithful to the references, although this is not necessarily supported by  
330 other metrics. We cannot report any compelling improvements in sequence identity, multiplicity,  
331 validity, and gene identification.



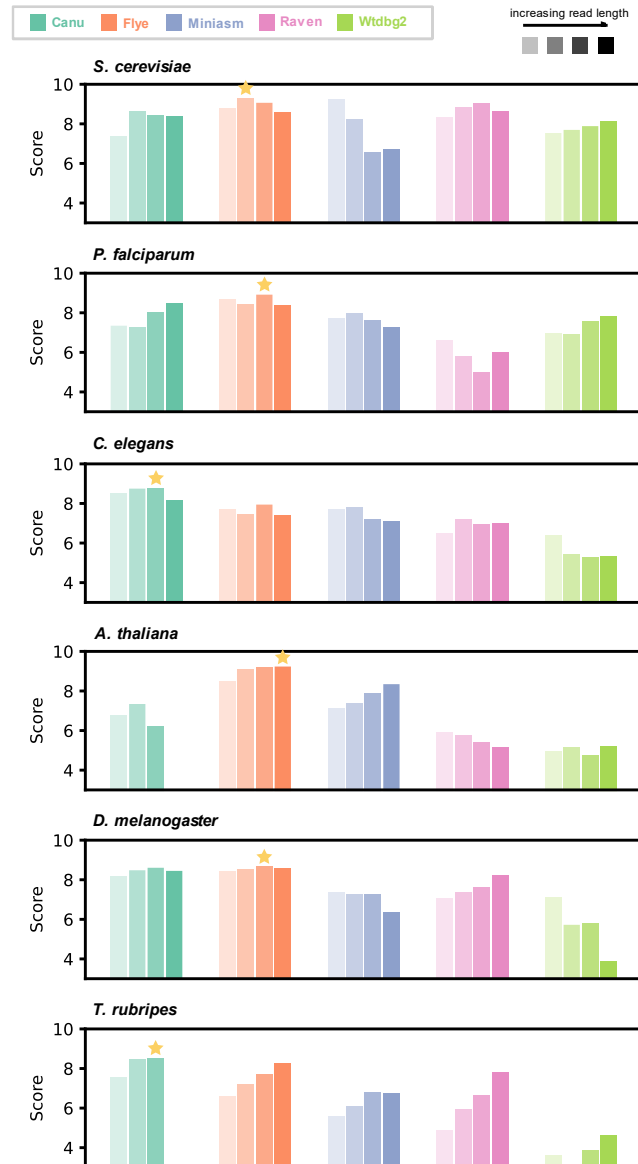

332

333 **Figure 4:** The performance of the five assemblers on all simulated read sets, with four different read length distributions (as  
334 previously described in Table 1). A score of 1 - 10 is reported for each assembler. The results are normalized for each genome,  
335 per sequencing technology. An average score for each read length distribution is first computed per technology (ONT, PacBio  
336 CLR, PacBio HiFi), and then these three scores are averaged to obtain an overall score per read length distribution.

## 337 Conclusion

338 In fulfilment of the first objective of this study, we conclude that Flye is the highest performing  
339 assembler when considering the overview of all evaluation categories in this benchmark, which  
340 include the sequence identity, repeat collapse, rate of valid sequences, contiguity, misassembly count,  
341 and gene identification. Rankings are mostly consistent for all three sequencing platforms included in

342 the study: PacBio CLR, PacBio HiFi and ONT. However, no assembler ranks first in all evaluation  
343 categories, suggesting that the choice of assembler is often a trade-off between certain advantages  
344 and disadvantages. Therefore, we have corroborated the conclusion of Wick and Holt [7], who  
345 benchmarked long-read assemblers on prokaryotes, for eukaryotic organisms, and recommend that  
346 these benchmarking parameters are considered in relation to the desired outcome of an assembly  
347 experiment.

348 Additionally, the tests performed on real reads validate our rankings of simulated-read assemblies.  
349 Flye, the assembler that scored consistently well in most evaluation categories for assemblies of  
350 simulated reads, also ranks first when evaluated on several sets of real reads sequenced on long-read  
351 platforms.

352 Regarding our second objective, which addressed the effect of increased read length on assembly  
353 quality, the benchmarking of assemblers on read sets with different read length distributions suggests  
354 that longer reads have the potential to improve assembly quality. However, this depends on the size  
355 and complexity of the genome that is being reconstructed. We found that improvements in contiguity  
356 were most significant among all metrics, as also supported by the conclusion of [8], who showed that  
357 using third generation sequencing considerably improves contiguity in assembling a plant genome (*M.*  
358 *jansinii*). However, we did not find significant improvements in other aspects of assembly quality,  
359 such as sequence identity or gene identification.

## 360 Data availability

361 All accessions to the reference genomes used in this study are included in Supplementary Table S1.

362 The read sets that were used for the creation of error and QScore models for the simulator are

363 included in Supplementary Table S2. These models are available at

364 <https://github.com/AbeelLab/long-read-assembly-benchmark>. The accessions for the real reads we

365 assembled are included in Supplementary Table S4. All other data is reproducible as per the  
366 commands in Supplementary Tables S3 and S6.

## 367 Code availability

368 Our evaluations were produced with QUAST v5.0.2 [28], BUSCO v5.4.2 [30, 31], and COMPASS [13].  
369 We also provide the scripts we used on [https://github.com/AbeelLab/long-read-assembly-](https://github.com/AbeelLab/long-read-assembly-benchmark)  
370 [benchmark](https://github.com/AbeelLab/long-read-assembly-benchmark).

## 371 References

- 372 1. Boycott KM, Vanstone MR, Bulman DE, MacKenzie AE. Rare-disease genetics in the era of next-  
373 generation sequencing: discovery to translation. *Nature Reviews Genetics*. 2013; doi:  
374 10.1038/nrg3555.
- 375 2. Bras J, Guerreiro R, Hardy J. Use of next-generation sequencing and other whole-genome  
376 strategies to dissect neurological disease. *Nature Reviews Neuroscience*. 2012; doi:  
377 10.1038/nrn3271.
- 378 3. Grada A, Weinbrecht K. Next-Generation Sequencing: Methodology and Application. *Journal of*  
379 *Investigative Dermatology*. 2013; doi: 10.1038/jid.2013.248.
- 380 4. Schlötterer C, Kofler R, Versace E, Tobler R, Franssen SU. Combining experimental evolution with  
381 next-generation sequencing: a powerful tool to study adaptation from standing genetic variation.  
382 *Heredity*. 2015; doi: 10.1038/hdy.2014.86.
- 383 5. Salazar AN, Gorter de Vries AR, van den Broek M, Wijsman M, de la Torre Cortés P, Brickwedde A,  
384 et al.. Nanopore sequencing enables near-complete de novo assembly of *Saccharomyces cerevisiae*  
385 reference strain CEN.PK113-7D. *FEMS Yeast Res*. 2017; doi: 10.1093/femsyr/fox074.
- 386 6. Amarasinghe SL, Su S, Dong X, Zappia L, Ritchie ME, Gouil Q. Opportunities and challenges in long-  
387 read sequencing data analysis. *Genome Biology*. 2020; doi: 10.1186/s13059-020-1935-5.
- 388 7. Wick RR, Holt KE. Benchmarking of long-read assemblers for prokaryote whole genome  
389 sequencing. *F1000Research*. 2021; doi: 10.12688/f1000research.21782.4.
- 390 8. Murigneux V, Rai SK, Furtado A, Bruxner TJC, Tian W, Harliwong I, et al.. Comparison of long-read  
391 methods for sequencing and assembly of a plant genome. *GigaScience*. 2020; doi:  
392 10.1093/gigascience/giaa146.
- 393 9. Jung H, Jeon M-S, Hodgett M, Waterhouse P, Eyun S. Comparative Evaluation of Genome  
394 Assemblers from Long-Read Sequencing for Plants and Crops. *Journal of Agricultural and Food*  
395 *Chemistry*. 2020; doi: 10.1021/acs.jafc.0c01647.

- 396 10. Chen Z, Erickson DL, Meng J. Benchmarking Long-Read Assemblers for Genomic Analyses of  
397 Bacterial Pathogens Using Oxford Nanopore Sequencing. *International Journal of Molecular Sciences*.  
398 2020; doi: 10.3390/ijms21239161.
- 399 11. Letunic I, Bork P. Interactive Tree Of Life (iTOL) v5: an online tool for phylogenetic tree display  
400 and annotation. *Nucleic Acids Research*. 2021; doi: 10.1093/nar/gkab301.
- 401 12. Earl D, Bradnam K, John JS, Darling A, Lin D, Fass J, et al.. Assemblathon 1: A competitive  
402 assessment of de novo short read assembly methods. *Genome Research*. 2011; doi:  
403 10.1101/gr.126599.111.
- 404 13. Bradnam KR, Fass JN, Alexandrov A, Baranay P, Bechner M, Birol I, et al.. Assemblathon 2:  
405 evaluating de novo methods of genome assembly in three vertebrate species. *GigaScience*. 2013;  
406 doi: 10.1186/2047-217X-2-10.
- 407 14. Dijk EL van, Auger H, Jaszczyszyn Y, Thermes C. Ten years of next-generation sequencing  
408 technology. *Trends in Genetics*. 2014; doi: 10.1016/j.tig.2014.07.001.
- 409 15. Wick R. Badread: simulation of error-prone long reads. *JOSS*. 2019; doi: 10.21105/joss.01316.
- 410 16. Nurk S, Koren S, Rhie A, Rautiainen M, Bzikadze AV, Mikheenko A, et al.. The complete sequence  
411 of a human genome. *Science*. 2022; doi: 10.1126/science.abj6987.
- 412 17. Li H. Minimap2: pairwise alignment for nucleotide sequences. Birol I, editor. *Bioinformatics*.  
413 2018; doi: 10.1093/bioinformatics/bty191.
- 414 18. Koren S, Walenz BP, Berlin K, Miller JR, Bergman NH, Phillippy AM. Canu: scalable and accurate  
415 long-read assembly via adaptive  $k$ -mer weighting and repeat separation. *Genome Research*. 2017;  
416 doi: 10.1101/gr.215087.116.
- 417 19. Kolmogorov M, Yuan J, Lin Y, Pevzner PA. Assembly of long, error-prone reads using repeat  
418 graphs. *Nat Biotechnol*. 2019; doi: 10.1038/s41587-019-0072-8.
- 419 20. Tvedte ES, Gasser M, Sparklin BC, Michalski J, Hjelman CE, Johnston JS, et al.. Comparison of  
420 long-read sequencing technologies in interrogating bacteria and fly genomes. *G3*  
421 *Genes/Genomes/Genetics*. 2021; doi: 10.1093/g3journal/jkab083.
- 422 21. Ruan J, Li H. Fast and accurate long-read assembly with wtdbg2. *Nature Methods*. 2020; doi:  
423 10.1038/s41592-019-0669-3.
- 424 22. Vaser R, Šikić M. Time- and memory-efficient genome assembly with Raven. *Nature*  
425 *Computational Science*. 2021; doi: 10.1038/s43588-021-00073-4.
- 426 23. Li H. Minimap and miniasm: fast mapping and de novo assembly for noisy long sequences.  
427 *Bioinformatics*. 2016; doi: 10.1093/bioinformatics/btw152.
- 428 24. Chen Z, Erickson DL, Meng J. Polishing the Oxford Nanopore long-read assemblies of bacterial  
429 pathogens with Illumina short reads to improve genomic analyses. *Genomics*. 2021; doi:  
430 10.1016/j.ygeno.2021.03.018.
- 431 25. Hu T, Chitnis N, Monos D, Dinh A. Next-generation sequencing technologies: An overview.  
432 *Human Immunology*. 2021; doi: 10.1016/j.humimm.2021.02.012.

- 433 26. Wick RR, Holt KE. Polypolish: Short-read polishing of long-read bacterial genome assemblies.  
434 *PLOS Computational Biology*. 2022; doi: 10.1371/journal.pcbi.1009802.
- 435 27. Vaser R, Sović I, Nagarajan N, Šikić M. Fast and accurate de novo genome assembly from long  
436 uncorrected reads. *Genome Research*. 2017; doi: 10.1101/gr.214270.116.
- 437 28. Gurevich A, Saveliev V, Vyahhi N, Tesler G. QUILT: quality assessment tool for genome  
438 assemblies. *Bioinformatics*. 2013; doi: 10.1093/bioinformatics/btt086.
- 439 29. Barthelson R, McFarlin AJ, Rounsley SD, Young S. Plantago: Modeling Whole Genome  
440 Sequencing and Assembly of Plant Genomes. *PLoS ONE*. 2011; doi: 10.1371/journal.pone.0028436.
- 441 30. Simão FA, Waterhouse RM, Ioannidis P, Kriventseva EV, Zdobnov EM. BUSCO: assessing genome  
442 assembly and annotation completeness with single-copy orthologs. *Bioinformatics*. 2015; doi:  
443 10.1093/bioinformatics/btv351.
- 444 31. Waterhouse RM, Seppey M, Simão FA, Manni M, Ioannidis P, Klioutchnikov G, et al.. BUSCO  
445 Applications from Quality Assessments to Gene Prediction and Phylogenomics. *Molecular Biology  
446 and Evolution*. 2018; doi: 10.1093/molbev/msx319.
- 447
